# Supplementary material for: A CPC-shelterin-BTR axis regulates mitotic telomere deprotection
Source: Springer Nature journal article supplement (doi:10.1038/s41467-025-57456-8), 2025-03-17

## SUPPLEMENTARY INFORMATION

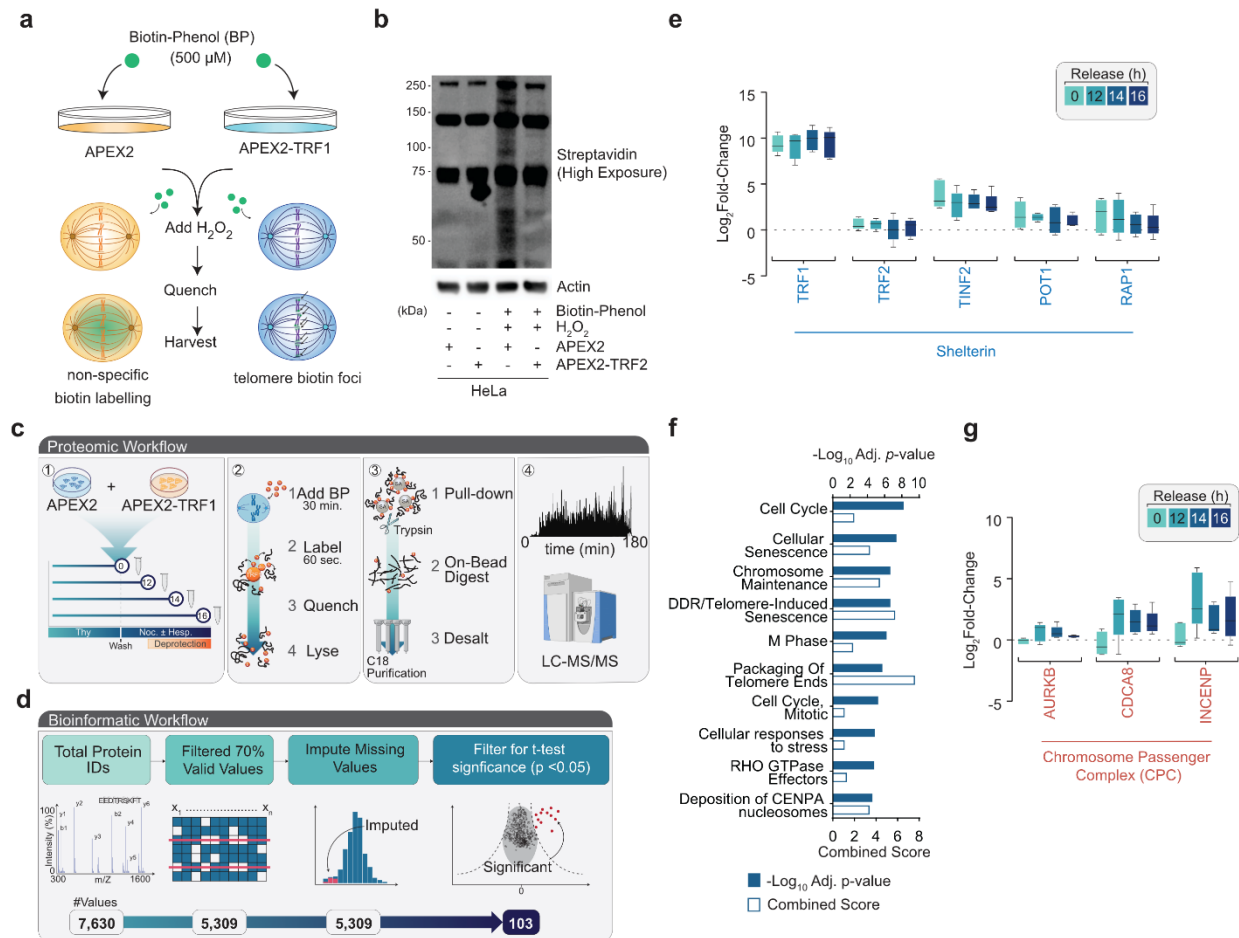

**Supplementary Figure 1. Proximity dependent TRF1 interactomics reveals components of the MAD telomere deprotection pathway.** **a.** Schematic of APEX2-TRF1 proximal biotin-labelling for interactomics. **b.** Immunoblot of streptavidin bound to whole cell extracts derived from APEX2 or APEX2-TRF1 HeLa cells with or without APEX2 activation with Biotin-phenol and hydrogen peroxide (H<sub>2</sub>O<sub>2</sub>) (representative example of n = 3 biological replicates). **c, d.** Schematic of the proteomics (c) and bioinformatics (d) workflow for APEX2-TRF1 interactomics. Drawing of the mass spectrometer was created in BioRender (Cesare, T. (2025) <https://BioRender.com/r86h834>). **e.** Log<sub>2</sub>-fold change in streptavidin-precipitated shelterin proteins between APEX2-TRF1 and APEX2 samples (Tukey's boxplot, median ± IQR, n = 5 biological replicates). **f.** Enrichr gene ontology analysis of proteins significantly enriched within mitotic Flag-APEX2-TRF1 datasets. Ontology terms are ranked by -Log<sub>10</sub> p-value (filled bars), reporting Enrichr combined score (empty bars). **g.** Log<sub>2</sub>-fold change in streptavidin-precipitated Chromosome Passenger Complex proteins between APEX2-TRF1 and APEX2 samples (Tukey's boxplot, median ± IQR, n = 5 biological replicates). Quantitative source data are provided as a Source Data file and source blots at the end of this document.

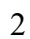

**Supplementary Figure 2. AURKB consensus sites at TRF1-S354 and -T358 participate in MAD telomere deprotection.** **a.** Immunoblots of whole cell extracts from Control or TRF1 shRNA IMR90 E6E7 hTERT (representative example of  $n \geq 3$  biological replicates). **b.** Immunoblots of whole cell extracts from Control or TRF1 shRNA IMR90 E6E7 hTERT expressing the indicated shRNA resistant Flag-TRF1 alleles (representative of  $n \geq 3$  biological replicates). **c.** Metaphase-telomere deprotection induced foci (TIF) assays stained with  $\gamma$ H2AX immunofluorescence (red), telomere FISH (TelC, green), and DAPI (blue) in control or TRF1 shRNA IMR90 E6E7 hTERT expressing the indicated shRNA-resistant FLAG-TRF1 alleles. All images are from cells treated with  $100 \text{ ng mL}^{-1}$  colcemid for 24 hours prior to sample collection (representative images from  $n \geq 3$  biological replicates). Scale bar,  $10 \mu\text{m}$ . **d, e.** Immunoblots of whole cell extracts from control or TRF1 shRNA IMR90 E6E7 hTERT expressing the indicated shRNA resistant TRF1 alleles (representative of  $n = 3$  biological replicates). **f.** Quantitation of metaphase-TIF in TRF1 shRNA HT1080 and TRF1 shRNA HCT116 cells expressing the indicated TRF1 alleles. Cells were treated with 24 hours of  $100 \text{ ng mL}^{-1}$  colcemid ( $n = 2$  biological replicates; 30 metaphases per replicate for HT1080, 25 and 30 metaphases for HCT116, compiled into a Tukey boxplot, Kruskal-Wallis followed by Dunn's multiple comparisons test). **g.** Representative images of  $n = 2$  biological replicates for mScarlet- or mClover-tagged TRF1 and TRF2 variants in cells treated with  $100 \text{ ng mL}^{-1}$  colcemid for 24 hours. TRF1-3A, S296A/S354A/T358A; TRF2-2A, S62A/S65A; TRF2-2D, S62D/S65D. Scale bar,  $10 \mu\text{m}$ , DNA is stained with DAPI (blue). **h.** Immunoblots of Flag immuno-precipitates from TRF1 shRNA HT1080 6TG cells expressing shRNA-resistant WT Flag-TRF1 or Flag-TRF1-T358A. Where indicated, cells were synchronised with a double-thymidine block (Thy) and released in the presence or absence of  $150 \text{ ng mL}^{-1}$  nocodazole (Noc) for 16 hours before sample collection. Where indicated extracts were treated with alkaline phosphatase (Alk. PPase). The pTRF1-T358 band is indicated. Representative of  $n = 3$  biological replicates. Quantitative source data are provided as a Source Data file and source blots at the end of this document.

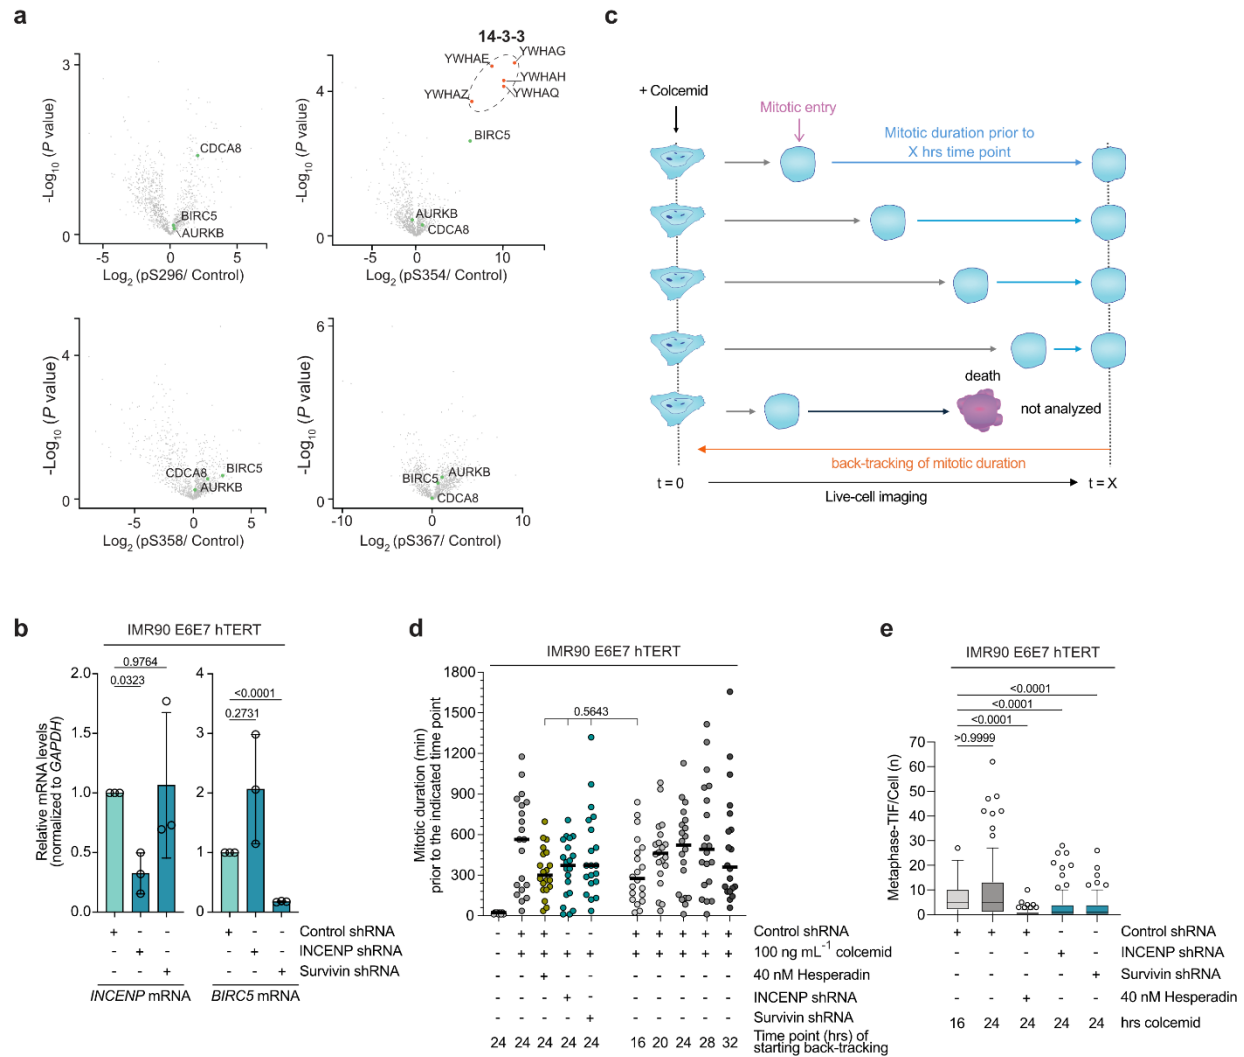

**Supplementary Figure 3. Survivin interacts with TRF1 phospho-peptides and is required for MAD telomere deprotection.** **a.** Volcano plots of LC-MS/MS analysis of TRF1 peptide pulldowns as depicted in Fig. 3a. LFQ values from proteins detected in phosphorylated TRF1 peptide pulldowns were compared to respective values in non-phosphorylated controls and plotted as a function of  $\log_2$  fold-change and  $-\log_{10}$  p-value. Enriched CPC members and 14-3-3 phospho-binding proteins are indicated (one-tailed student's T-test of  $n = 3$  biological replicates). **b.** Gene expression in IMR90 E6E7 hTERT five days after shRNA transduction measured by RT-qPCR and normalized to *GAPDH* (mean  $\pm$  s.d.,  $n = 3$  biological replicates, RM one-way ANOVA with the Geisser-Greenhouse correction). **c.** Schematic of mitotic duration analysis in **(d)**. Cells were exposed to 100 ng mL<sup>-1</sup> colcemid at the beginning of the movie. Mitotic cells at the time point of interest were backtracked to determine mitotic duration. **d.** Mitotic duration before the indicated time point in colcemid-treated IMR-90 E6E7 hTERT cells expressing indicated shRNA or exposed to Hesperadin (median,  $n = 20$  except for mock  $n = 10$ , Kruskal-Wallis test). **e.** Metaphase-telomere deprotection induced foci (TIF) in IMR90 E6E7 hTERT fibroblasts five days post-transduction with the indicated shRNAs. Cultures were treated with 100 ng mL<sup>-1</sup> colcemid with or without 40 nM Hesperadin for indicated hours prior to sample collection ( $n = 3$  biological replicates of 30 metaphases per replicate, compiled into a Tukey Box plot, Kruskal-Wallis followed by Dunn's multiple comparisons test). Source data are provided as a Source Data file.



**Supplementary Figure 4. The TRF2 basic domain functions in mitosis-specific telomere protection.** **a.** Immunoblots of Myc immuno-precipitates from TRF2 shRNA HT1080 6TG expressing WT Myc-TRF2 or Myc-TRF2-S65A. Where indicated, cells were double-thymidine block (Thy) synchronised, released in the presence or absence of 150 ng mL<sup>-1</sup> Nocodazole (Noc) for 16 hours, and/or treated with alkaline phosphatase (Alk. PPase). Representative of n = 3 biological replicates. **b, c.** Western blots of whole cell extracts from IMR90 E6E7 hTERT TRF2 transduced with Control or TRF2 shRNA (b) and the indicated TRF2 alleles (c) (representative of n ≥ 3 biological replicates). **d, e.** Examples of Interphase-telomere deprotection induced foci (TIF) (d) and Metaphase-TIF (e) stained with γH2AX immunofluorescence (red), telomere FISH (TelC, green), and DAPI (blue) from IMR90 E6E7 hTERT transduced with the indicated shRNA and TRF2 alleles (representative of n ≥ 3 biological replicates). In (e) cultures were treated with 100 ng mL<sup>-1</sup> colcemid for 2 or 24 hours prior to sample collection. **f, g.** Quantitation of interphase-TIF (f) and metaphase-TIF (g) in TRF2 shRNA IMR90 E6E7 hTERT expressing TRF2-WT or the indicated TRF2 variants. For (f), n = 3 biological replicates of 45 nuclei per replicate, compiled into a Tukey boxplot, Kruskal-Wallis followed by Dunn's multiple comparisons test. For (g), cells were treated with 2 or 24 hours of 100 ng mL<sup>-1</sup> colcemid (n = 3 biological replicates of 15 and 30 metaphases per replicate for 2 hours and 24 hours colcemid, respectively, compiled into a Tukey boxplot, Kruskal-Wallis followed by Dunn's multiple comparisons test). Data for Vector and TRF2-WT are the same as in Fig. 4d and 4e. **h, i.** Immunoblots of cell lysates (h) or anti-Myc immuno-precipitates (i) from TRF1 shRNA HT1080 6TG cells expressing Myc-TRF2-WT. Cells were thymidine block synchronised, released, and treated with 150 ng mL<sup>-1</sup> of nocodazole for 16 hours. Representative of n = 2 experimental replicates. Quantitative source data are provided as a Source Data file and source blots at the end of this document.



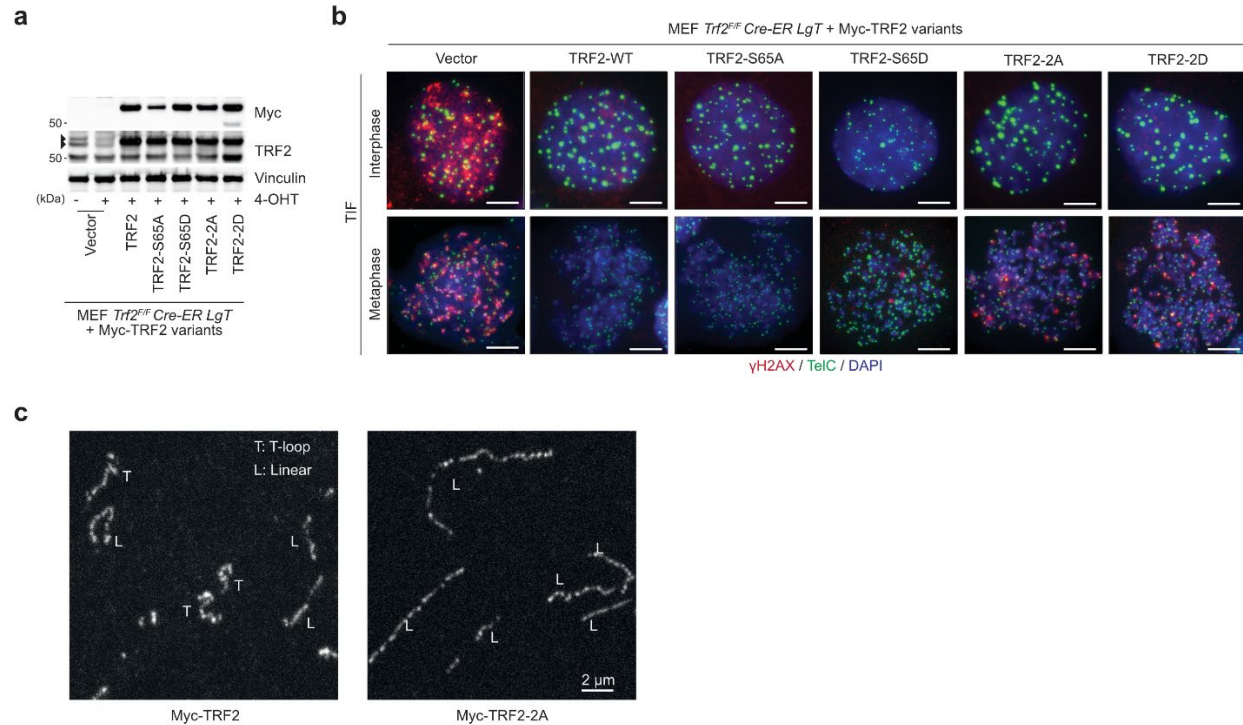

**Supplementary Figure 5. Imaging telomere deprotection and telomere macromolecular structure in *Trf2<sup>F/F</sup> Cre-ER LgT* MEFs.** **a.** Immunoblots of whole cell extracts derived from *Trf2<sup>F/F</sup> Cre-ER LgT* MEFs expressing the indicated Myc-tagged hTRF2 alleles. Where indicated the cultures were treated with 4-Hydroxytamoxifen (4-OHT) for 36 hours prior to sample collection to delete endogenous *mTrf2* (n = 1). **b.** Representative interphase-telomere deprotection induced foci (TIF) and metaphase-TIF images from *Trf2<sup>F/F</sup> Cre-ER LgT* MEFs expressing hTRF2-WT or the indicated hTRF2 variants. In all conditions endogenous *mTrf2* was deleted by 4-OHT addition 36 hours prior to sample fixation. Samples were stained with combined  $\gamma$ H2AX immunofluorescence (red) and telomere FISH (TelC, green). The DNA is labelled with DAPI (blue). For Metaphase-TIF assays, cells were treated with 400 ng mL<sup>-1</sup> Nocodazole for 14 hours prior to sample collection. Scale bar, 10  $\mu$ m. Representative from n = 3 biological replicates. **c.** Representative fields from Airyscan microscopy of telomere macromolecular structure. *Trf2<sup>F/F</sup> Cre-ER LgT* MEFs expressing Myc-TRF2-WT or Myc-TRF2-2A (S62A and S65A) were treated with 4-OHT for 36 hours prior to sample collection to delete endogenous *mTrf2*. Cultures were treated with 400 ng mL<sup>-1</sup> Nocodazole for 14 hours and collected by mitotic shake-off before trioxsalen cross-linked in situ, chromatin spreading on coverslips through cytocentrifugation, and telomere FISH staining. Linear (L) and t-loops (T) are shown. Scale bar, 2  $\mu$ m. Representative of n = 3 biological replicates. Source blots are provided at the end of this document.

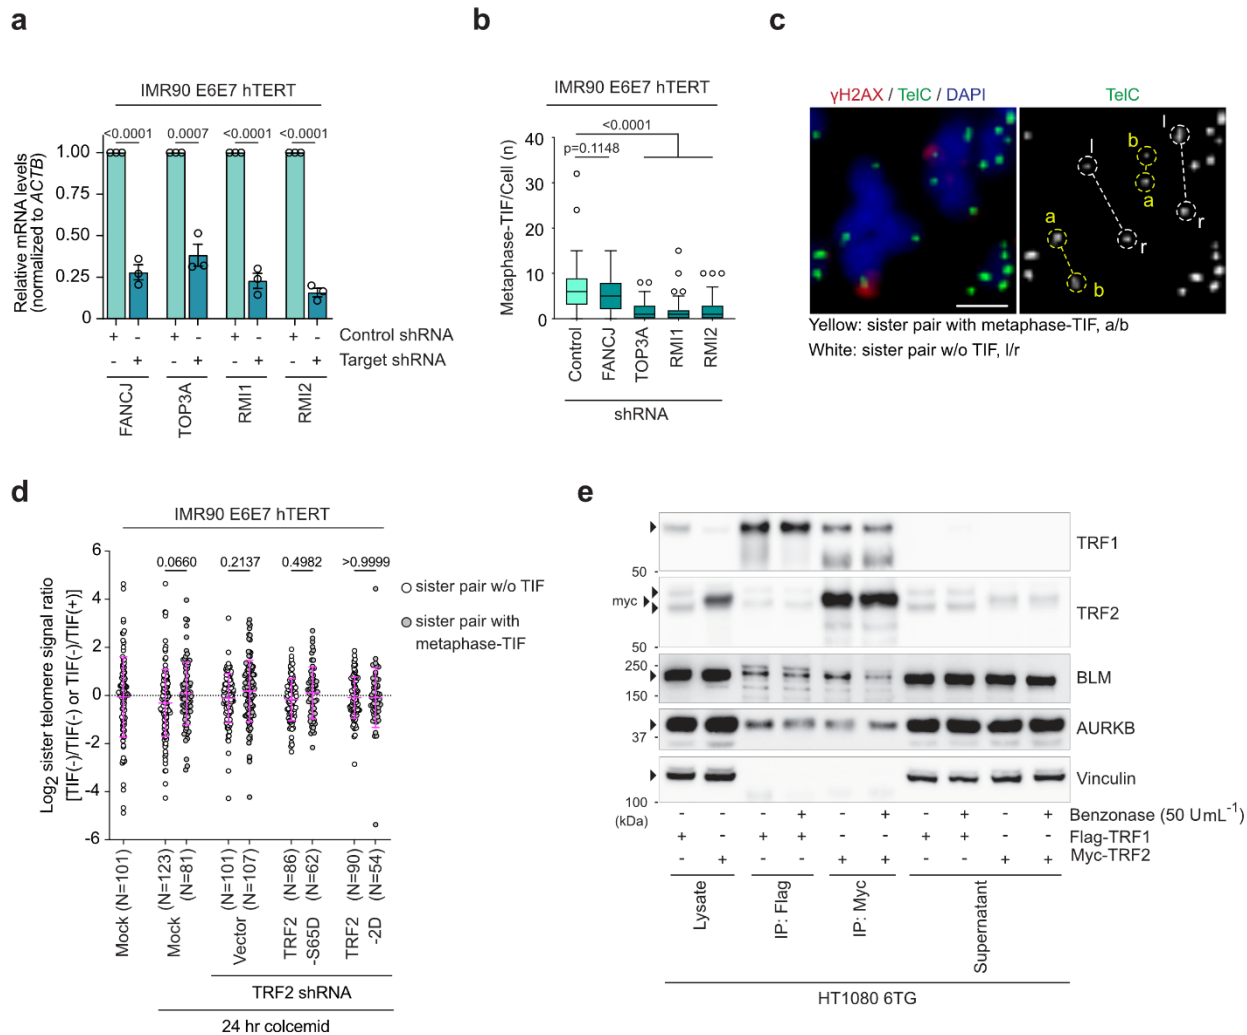



**Supplementary Figure 6. BTR promotes MAD telomere deprotection without telomere shortening.** **a.** Relative gene expression in shRNA transduced IMR90 E6E7 hTERT. For each targeted gene, transcription was measured by RT-qPCR and normalized to *ACTB* (mean  $\pm$  s.e.m.,  $n = 3$  biological replicates, unpaired two-tailed t test). **b.** Metaphase-telomere deprotection induced foci (TIF) in IMR90 E6E7 hTERT fibroblasts five days post-transduction with the indicated shRNAs. Cultures were treated with  $100 \text{ ng mL}^{-1}$  colcemid for 24 hours prior to sample collection ( $n = 3$  biological replicates of 30 metaphases per replicate, compiled into a Tukey Box plot, Kruskal-Wallis followed by Dunn's multiple comparisons test). **c.** Measurement of inter-chromatid telomere length variability. On metaphase-TIF assays stained with  $\gamma$ H2AX IF (red), telomere FISH (TelC, Green), and DAPI, we identified sister telomeres without  $\gamma$ H2AX staining (sister pair without (w/o) metaphase-TIF), or where a single chromatid was  $\gamma$ H2AX positive (sister pair with metaphase-TIF). Telomere length for each chromatid was measured by FISH intensity. We calculated the ratio between sister telomere lengths and plotted as  $\log_2$  values in (d). **d.** Ratio of sister telomere lengths as described in (c) for mock or TRF2 shRNA transduced IMR90 E6E7 hTERT  $\pm$  the indicated exogenous TRF2 alleles. Where indicated, cultures were treated with  $100 \text{ ng mL}^{-1}$  colcemid for 24 hours prior to sample collection (mean  $\pm$  s.d.,  $N$  pairs, ordinary one-way ANOVA followed by Šídák's multiple comparisons test,  $F = 2.048$ ,  $DF = (7, 696)$ ). **e.** Immunoblots of anti-Flag and anti-Myc immuno-precipitates from HT1080 6TG cells expressing TRF1 shRNA with shRNA-resistant Flag-TRF1-WT and TRF2 shRNA with Myc-TRF2-WT, respectively. Cells were synchronised with a thymidine block, released, and treated with  $150 \text{ ng mL}^{-1}$  of nocodazole for 16 hours. Following sample collection and extract preparation, the indicated lysates were incubated with  $50 \text{ U mL}^{-1}$  Benzonase for 15 min on ice prior to immunoprecipitation. Representative of  $n = 2$  biological replicates. Quantitative source data are provided as a Source Data file and source blots at the end of this document.

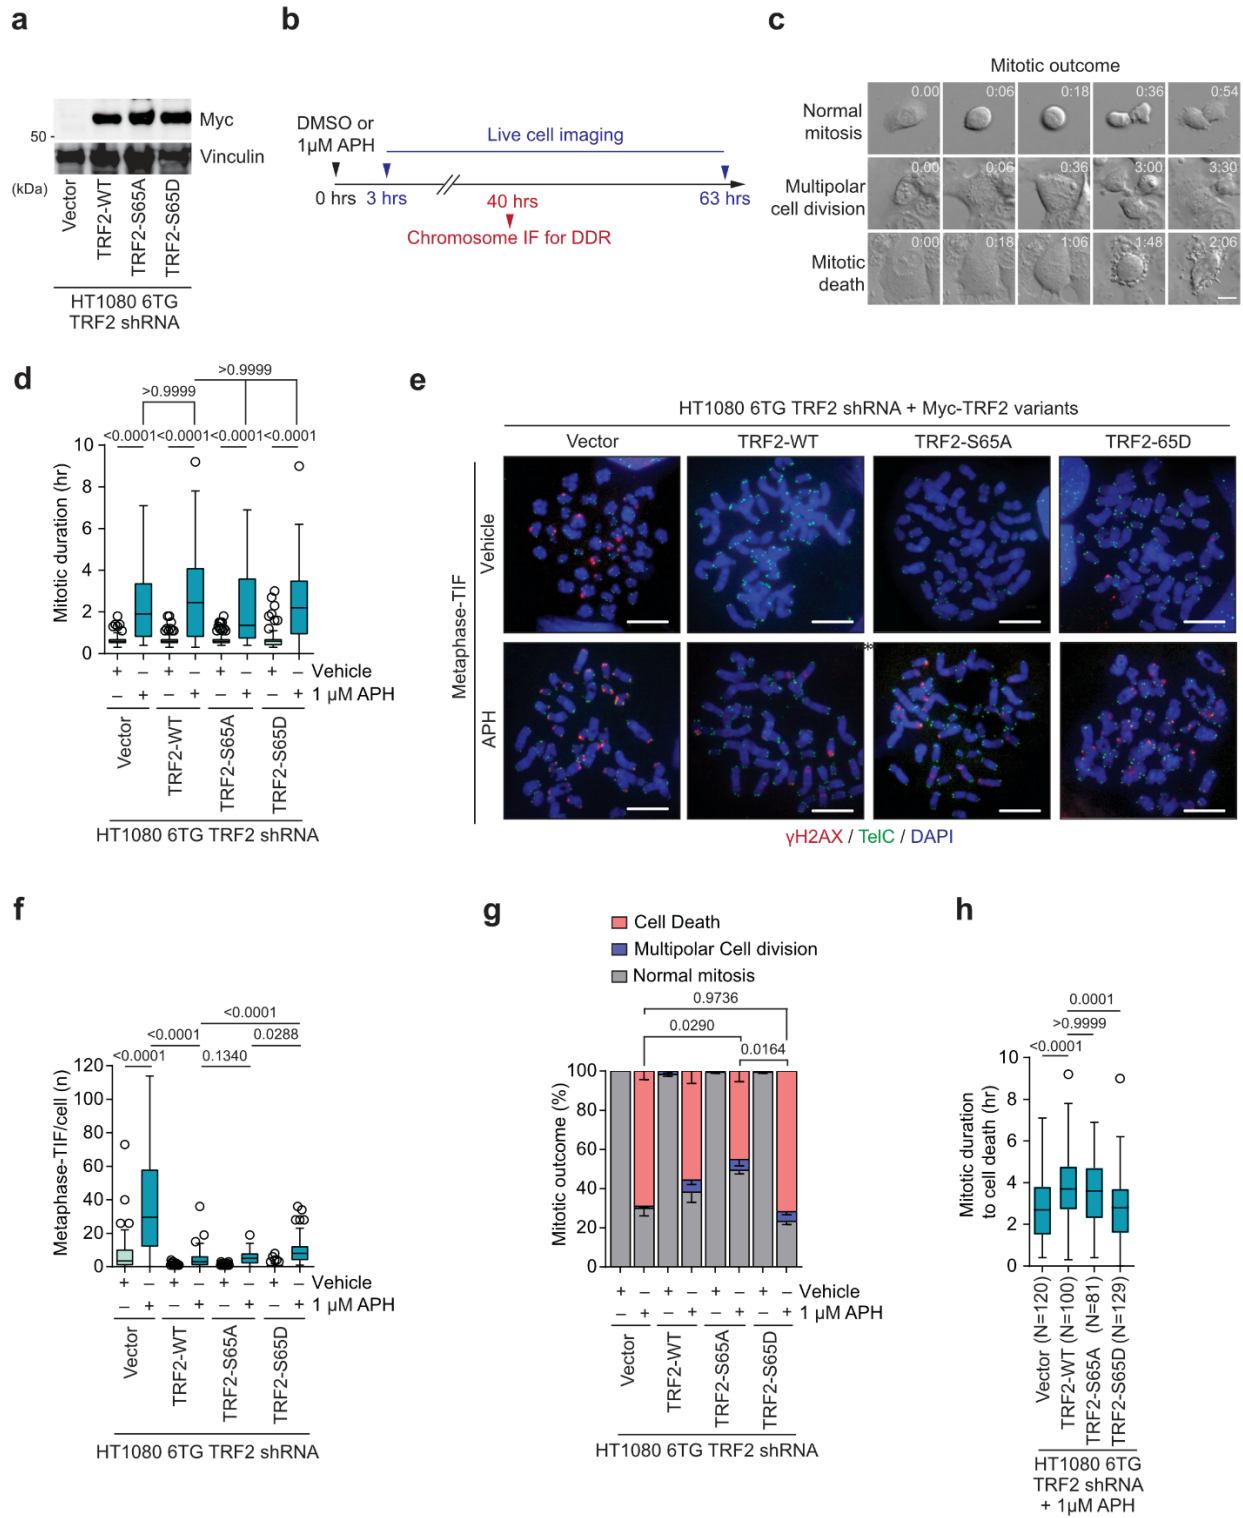

**Supplementary Figure 7. TRF2 phosphorylation promotes mitotic death after lethal replication stress.** **a.** Immunoblots of whole cell extracts derived from HT1080 6TG shTRF2 cells expressing the indicated Myc-TRF2 alleles (representative of  $n = 3$  biological replicates). **b.** Timeline of the experimentation in panels (c-h). **c.** Captures from differential interference contrast live imaging of HT1080 6TG cells treated with 1  $\mu$ M Aphidicolin (APH). Mitotic outcomes are indicated. Time is shown as hours: minutes relative to the first image. Scale bar, 20  $\mu$ m. Representative of  $n = 3$  biological replicates. **d.** Mitotic duration for TRF2 shRNA HT1080 6TG cells expressing the indicated Myc-TRF2 alleles. Cells were observed for 60 hours in cultures treated with or without 1  $\mu$ M Aphidicolin (APH) (mean  $\pm$  s.e.m.,  $n = 3$  biological replicates of 60 mitotic cells per replicate, Kruskal-Wallis followed by Dunn's multiple comparisons test). **e.** Representative metaphase-telomere deprotection induced foci (TIF) images stained with  $\gamma$ H2AX immunofluorescence (red), telomere FISH (TelC, green), and DAPI (blue) from TRF2 shRNA HT1080 6TG cultures expressing the indicated Myc-TRF2 alleles. Cultures were treated with 1  $\mu$ M Aphidicolin (APH) for 40 hours before sample collection. Scale bar, 10  $\mu$ m. Representative of  $n = 3$  biological replicates. **f.** Quantitation of metaphase-TIF from TRF2 shRNA HT1080 6TG cultures expressing the indicated Myc-TRF2 alleles. Where indicated, cultures were treated with 1  $\mu$ M Aphidicolin (APH) for 40 hours before sample collection ( $n = 3$  biological replicates of 30 metaphases per replicate compiled into a Tukey Box Plot, Kruskal-Wallis followed by Dunn's multiple comparisons test). **g.** Mitotic outcomes from the experiment in (d) (mean  $\pm$  s.e.m., % mitotic outcome from  $n = 3$  biological replicates, Ordinary one-way ANOVA followed by Tukey's multiple comparisons test for % Cell Death). **h.** Mitotic duration until death from the experiment in (d) (mean  $\pm$  s.e.m.,  $N$  mitotic cells from  $n = 3$  biological replicates, Kruskal-Wallis followed by Dunn's multiple comparisons test). Quantitative Source data are provided as a Source Data file and source blots at the end of this document.

## Source blots for the Supplementary Data

Supplementary Fig. 1b

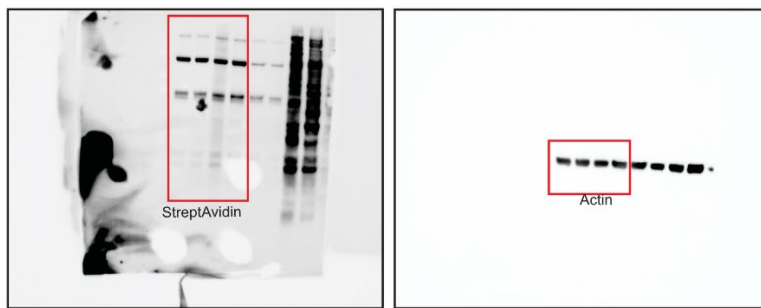

Supplementary Fig. 2a

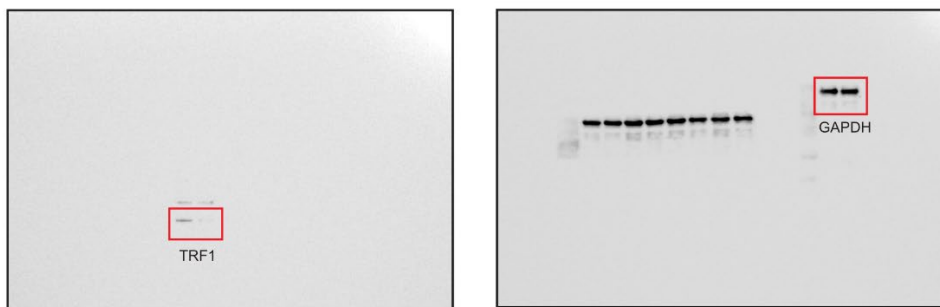

Supplementary Fig. 2b

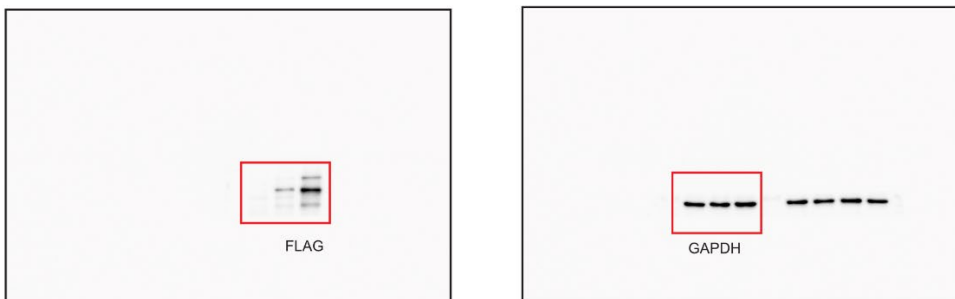

Supplementary Fig. 2d

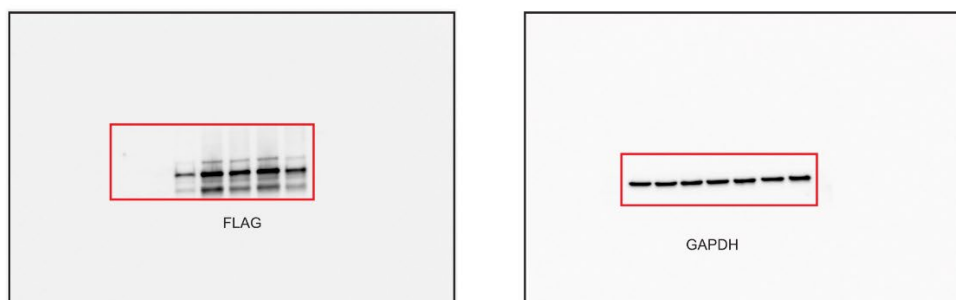

Supplementary Fig. 2e

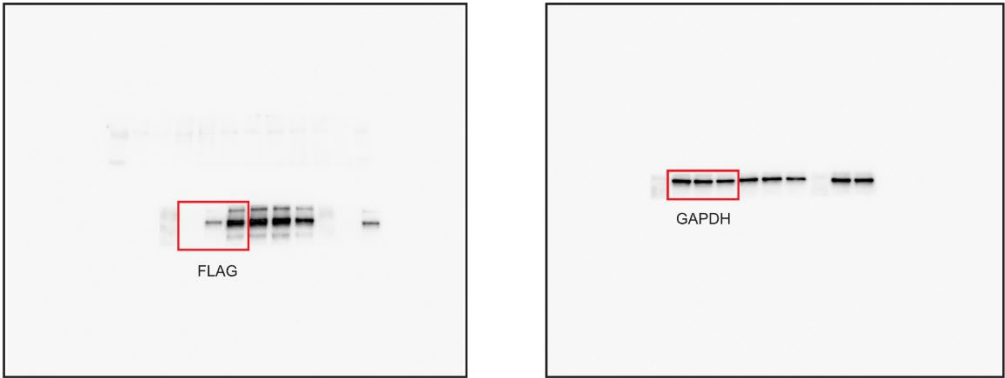

Supplementary Fig. 2h

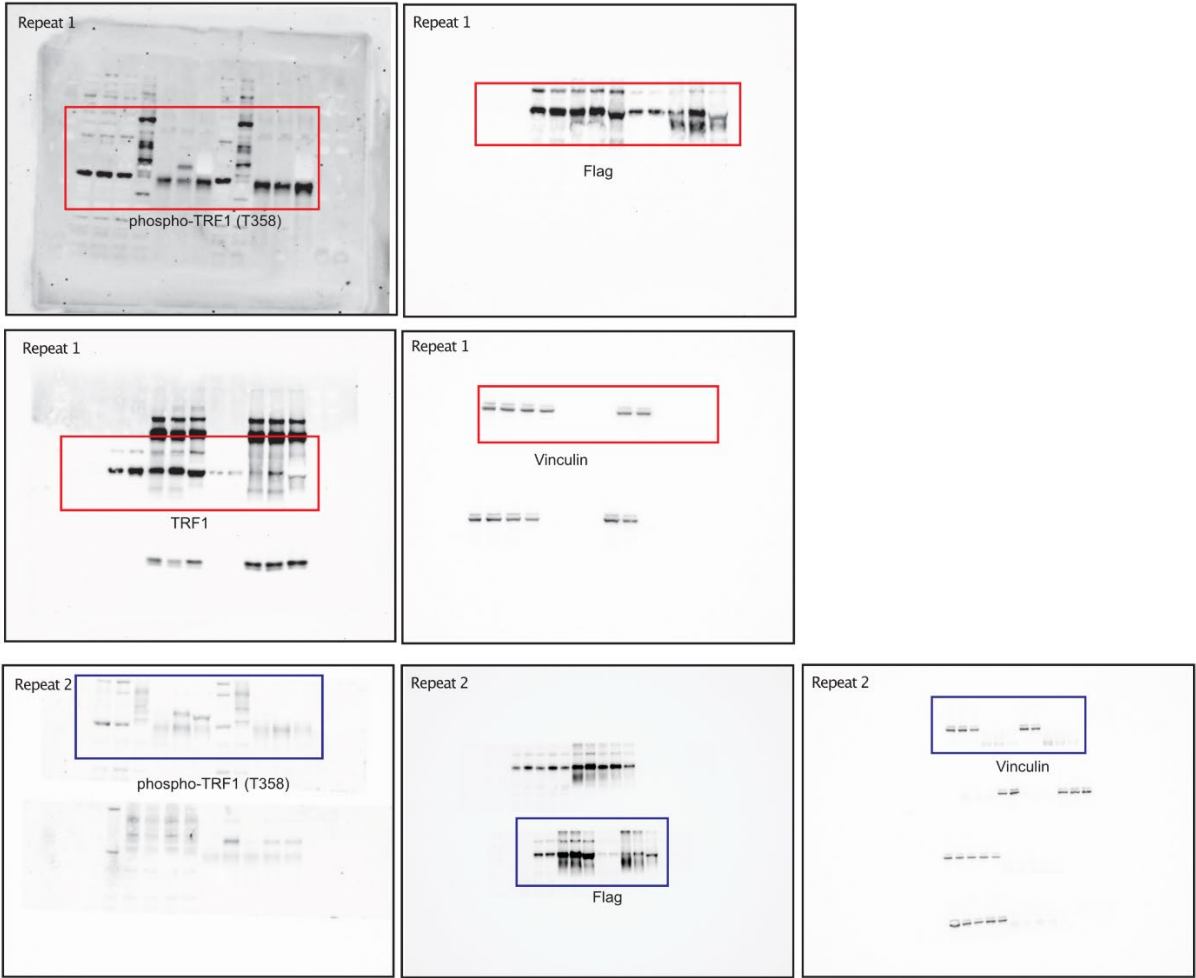

## Supplementary Fig. 4a

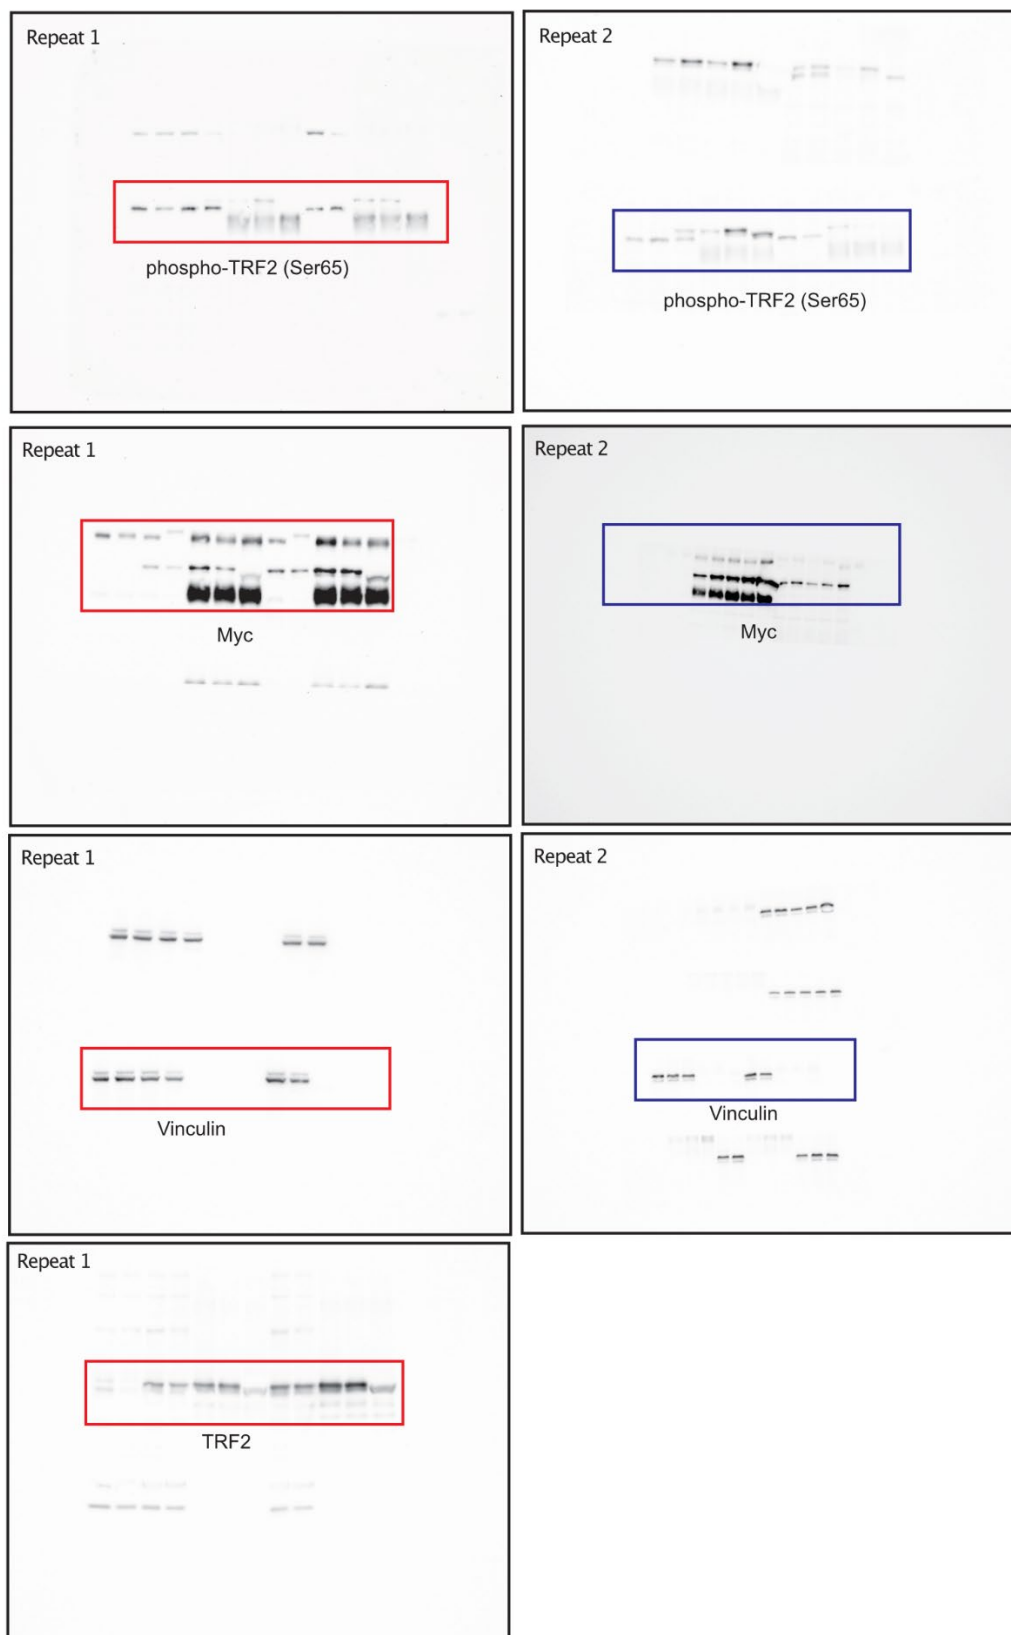



**Supplementary Fig. 4b**

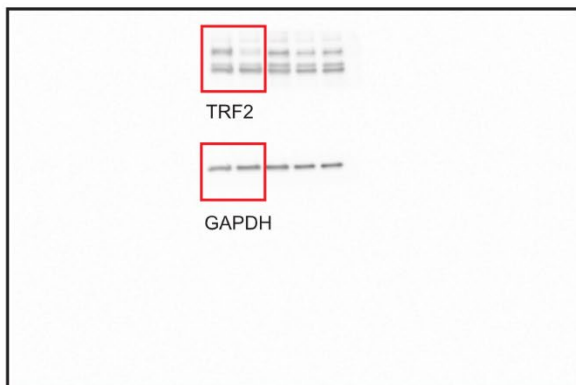

**Supplementary Fig. 4c**

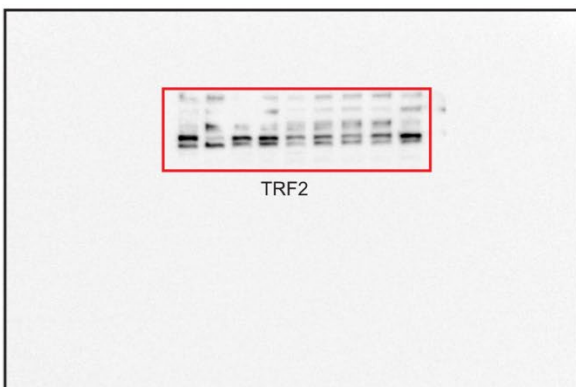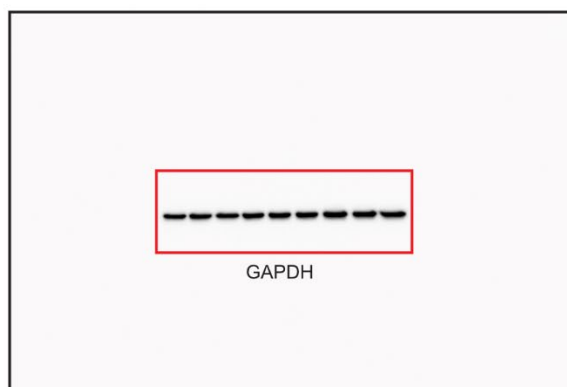

**Supplementary Fig. 4h**

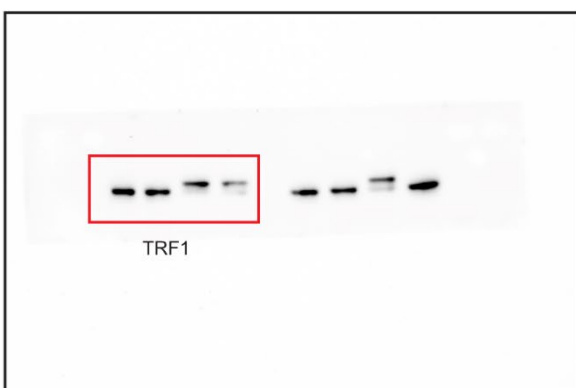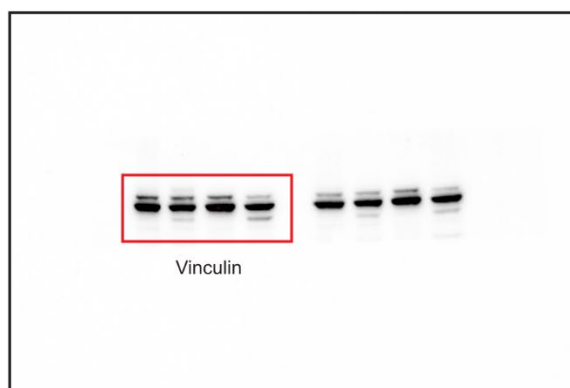

**Supplementary Fig. 4i**

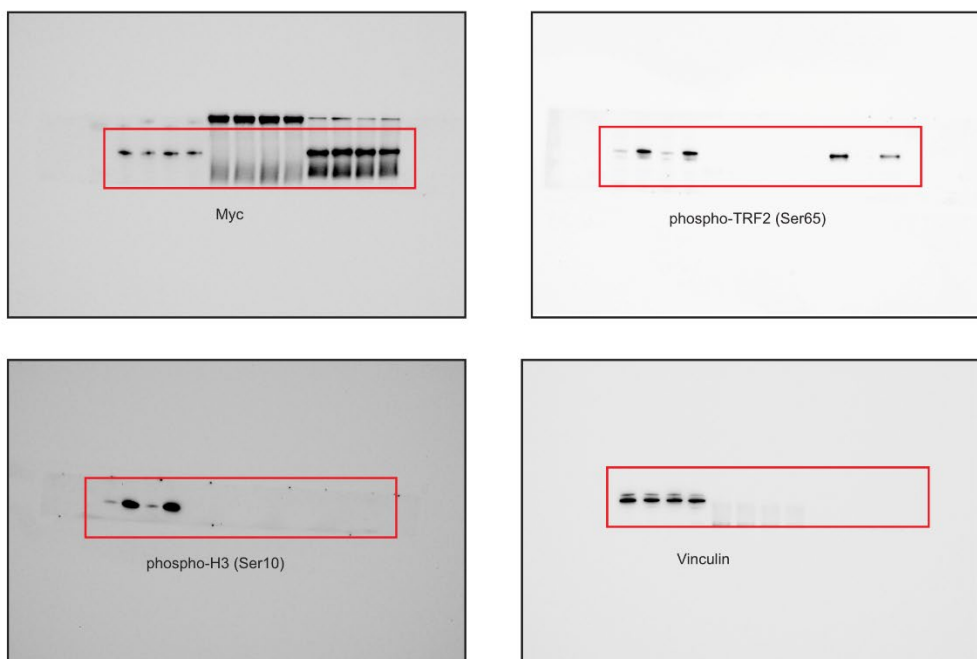

**Supplementary Fig. 5a**

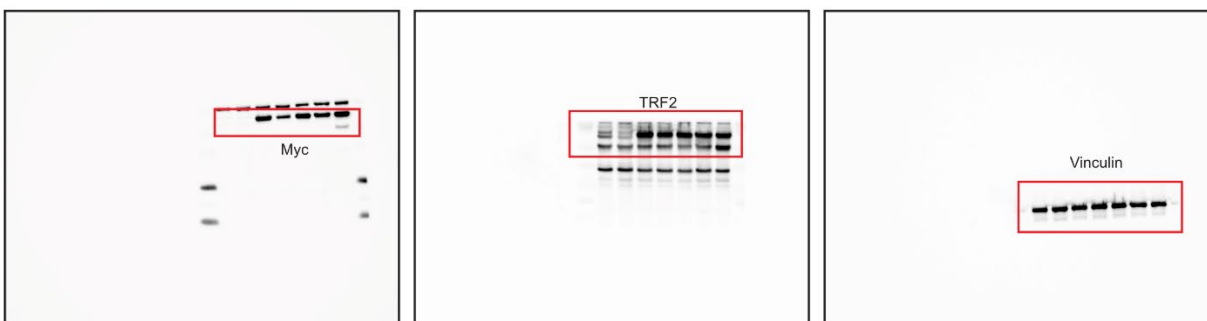

**Supplementary Fig. 6e**

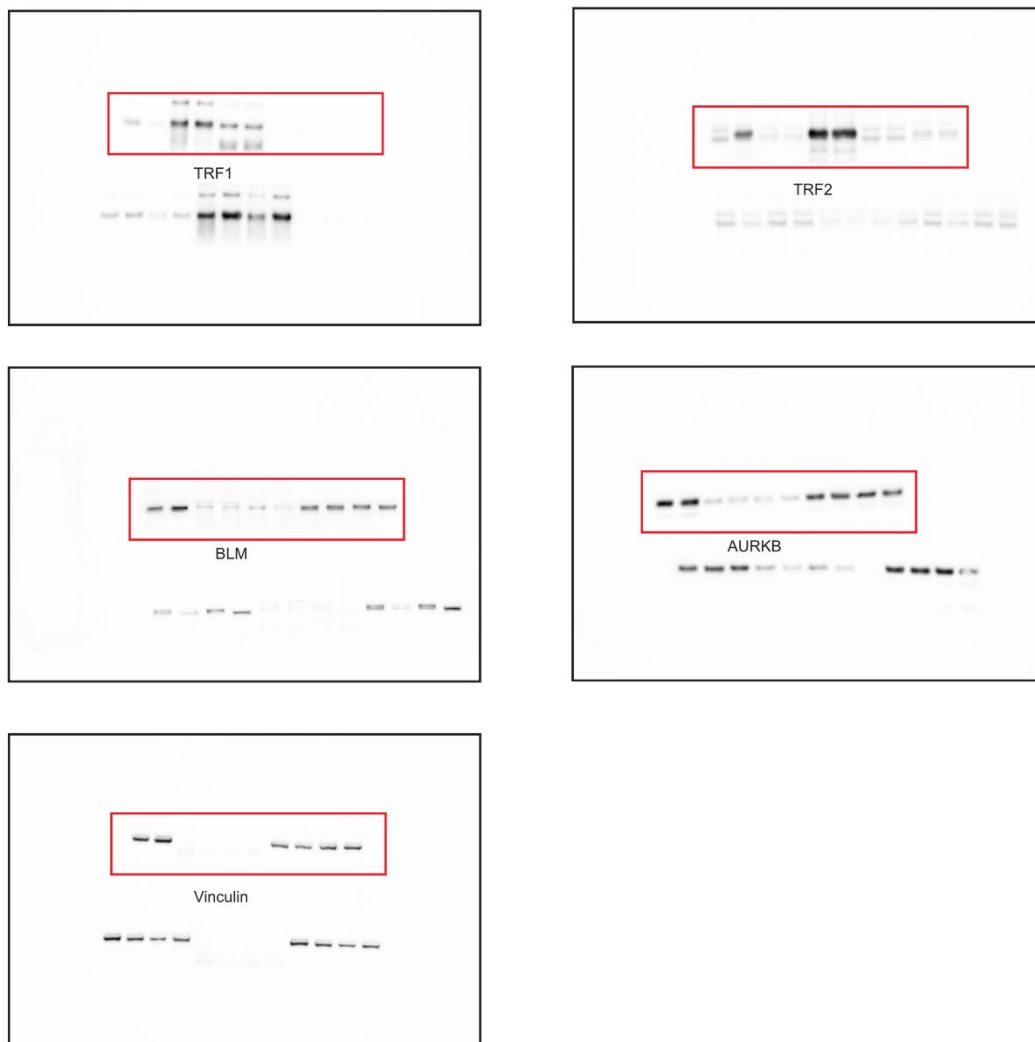

**Supplementary Fig. 7a**

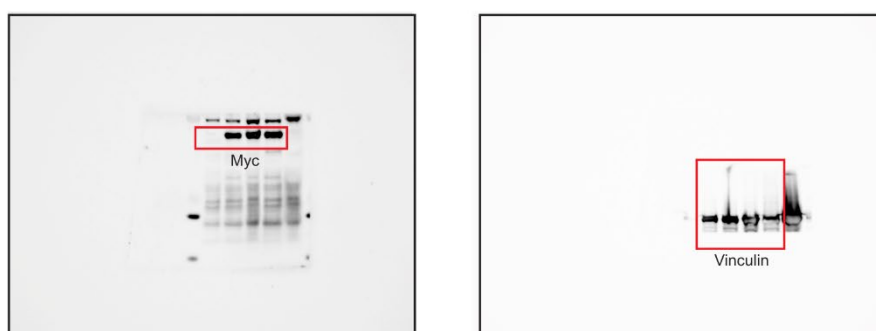

Supplement: MOESM1 [file 41467_2025_57456_MOESM1_ESM.pdf]
